# Supplementary material for: The Integrative Analysis of Competitive Endogenous RNA Regulatory Networks in Osteoporosis
Source: Research Square preprint supplement (doi:10.21203/rs.3.rs-1345754/v1), 2022-02-15
Supplement: Supplementary file 1 [file 05a24af050d316241b127f4e.xlsx]

## Sheet: Sheet1
circbase.ID	adj.P.Val	P.Value	logFC	Chromosome	circStart	circEnd	Host gene
hsa_circ_0028878	0.00254	5.43e-07	4.33382	chr12	120878256	120878529	COX6A1
hsa_circ_0030712	0.00358	7.18e-06	4.23567	chr13	99512658	99540801	DOCK9
hsa_circ_0134120	0.0042	1.05e-05	4.67255	chr7	31904555	31961207	PDE1C
hsa_circ_0112102	0.00486	1.47e-05	4.02628	chr1	222838847	222839203	MIA3
hsa_circ_0051728	0.00662	3.36e-05	-4.14181	chr19	48636238	48660397	LIG1
hsa_circ_0075939	0.00712	4.08e-05	4.93874	chr6	31752371	31752491	VARS
hsa_circ_0028877	0.00769	4.96e-05	4.14432	chr12	120876181	120878529	COX6A1
hsa_circ_0089345	0.00772	5e-05	-4.04768	chr9	136216766	136217582	RPL7A
hsa_circ_0082916	0.00823	5.85e-05	4.05382	chr7	150773712	150777881	FASTK
hsa_circ_0072602	0.00955	8.41e-05	4.18451	chr5	61689781	61690434	DIMT1
