# Supplementary material for: The Integrative Analysis of Competitive Endogenous RNA Regulatory Networks in Osteoporosis
Source: Research Square preprint supplement (doi:10.21203/rs.3.rs-1345754/v1), 2022-02-15
Supplement: Supplementary file 2 [file 669a89478fa4768973ae017b.xlsx]

## Sheet: Sheet1
Data source	Type	Platform	First author	Year	Sample source	Sample size（OP/N）	Organism	Region
GSE116925	mRNA	GPL20775	Li C	43327	BMSCs	3/3	Mus musculus	China
GSE35956	mRNA	GPL570	Benisch P	43549	BMSCs	5/5	human	Germany
GSE156508	mRNA	GPL16686	Panach L	44112	Primary osteoblasts	6/6	human	Spain
GSE74209	miRNA	GPL20999	de Ugarte L	42360	Femoral neck trabecular bone	6/6	human	Spain
GSE93883	miRNA	GPL18058	Sun M	43843	Plasma	6/6	human	China
GSE161361	ciRNA	GPL28148	Hua F	44266	Serum	3/3	human	China
GEO Gene Expression Omnibus, OP osteoporosis, N normal
